# Supplementary material for: Correlated Mutations: A Hallmark of Phenotypic Amino Acid Substitutions
Source: PubMed Central journal article supplement (PMC2940720; doi:10.1371/journal.pcbi.1000923), 2010-09-16
Supplement: pcbi.1000923.s001.pdf [file pcbi.1000923.s001.pdf]

# Supplement for “Correlated mutations: a hallmark of phenotypic amino acid substitutions”

Andreas Kowarsch, Angelika Fuchs, Dmitrij Frishman and Philipp Pagel

# 1 LOD score histograms for the data set with alignment threshold $\geq 125$

## 1.1 Empirical background distribution

Empirical background distribution obtained by 1000 permutations. Vertical lines indicate the observed LOD obtained by data set using an alignment cutoff of  $\geq 125$  (dotted).

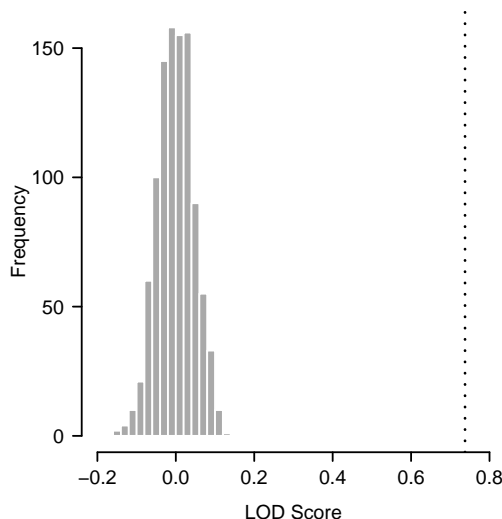

## 1.2 LOD distribution for individual proteins

### 1.2.1 All proteins

Distribution of log odds (LOD) scores for individual proteins using an alignment cutoff of  $\geq 125$  (equivalent to Figure 2a). All proteins were excluded for which no score could be obtained.

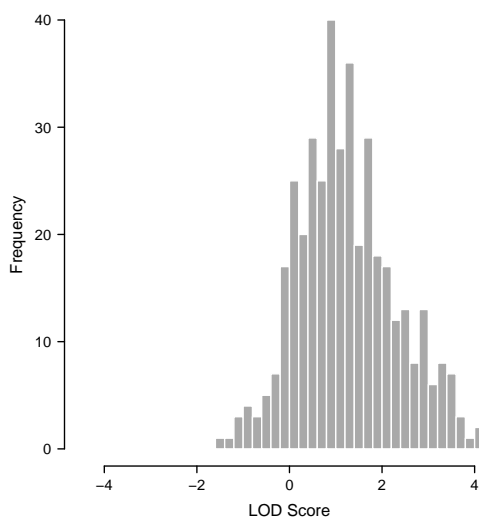

### 1.2.2 Proteins with $\geq 10$ disease mutations

Distribution of log odds (LOD) scores for individual proteins using an alignment cutoff of  $\geq 125$  (equivalent to Figure 2b). LOD scores were plotted only for proteins with  $\geq 10$  known disease mutations in HGMD. All proteins were excluded for which no score could be obtained.

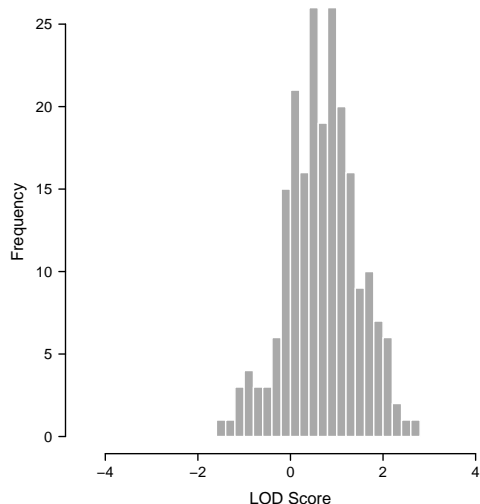

### 1.3 Interaction between correlation and conservation

#### 1.3.1 BLOSSUM conservation score

Interaction between correlation and conservation. LOD distribution for conservation thresholds using the BLOSSUM conservation score (equivalent to Figure 3a). Each dot represents the LOD score achieved using a specific conservation cutoff. A cutoff of 0.4 indicates that for the calculation of the global LOD score only the residues which have a conservation score  $\leq 0.4$  were taken into account.

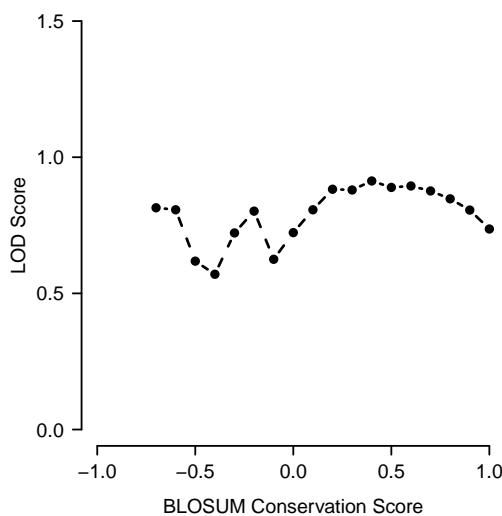

#### 1.3.2 Fractional identity

Interaction between correlation and conservation. LOD distribution for conservation thresholds using the fractional identity (equivalent to Figure 3b). Each dot represents the LOD score achieved using a specific conservation cutoff. A cutoff of 0.4 indicates that for the calculation of the global LOD score only the residues which have a conservation score  $\leq 0.4$  were taken into account.

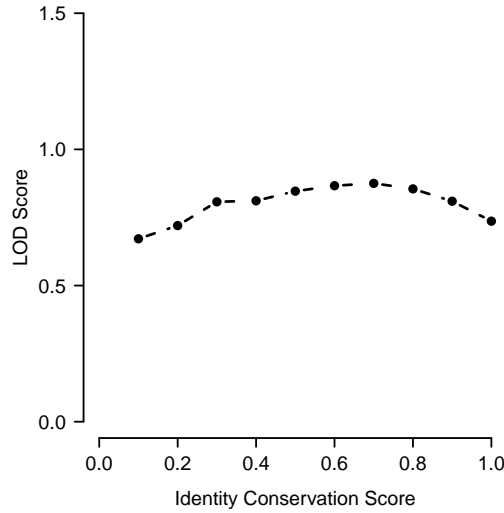

## 2 Summary table of spatial distance of residues

Analysis of spatial distance of residues. All: all residues; Disease: only disease affected residues.

| subset  | Distance-Threshold | Residues | Contact       |
|---------|--------------------|----------|---------------|
| All     | $\leq 5.5$         | 70589    | 59079 (83.7%) |
| Disease | $\leq 5.5$         | 2747     | 2522 (91.8%)  |
| All     | $\leq 8.0$         | 70589    | 59022 (83.6%) |
| Disease | $\leq 8.0$         | 2747     | 2523 (91.8%)  |

## 3 Summary table of spatial distance of co-evolving positions

Distance analysis of co-evolving positions using different alignment cutoffs as well as distance thresholds. All: all significantly correlated residue pairs; Disease: significantly correlated residue pairs for which at least on residue is affected by a disease mutation; Corr-Pairs: Number of significantly correlated residue pairs; Contact: Number of significantly correlated contact pairs.

| subset  | Alignment Cutoff | Distance-Threshold | Corr-Pairs | Contact      |
|---------|------------------|--------------------|------------|--------------|
| All     | 30               | $\leq 5.5$         | 16555      | 3717 (16.4%) |
| Disease | 30               | $\leq 5.5$         | 1636       | 261 (15.9%)  |
| All     | 125              | $\leq 5.5$         | 13339      | 2342 (17.5%) |
| Disease | 125              | $\leq 5.5$         | 1131       | 209(18.5%)   |
| All     | 30               | $\leq 8.0$         | 16555      | 2887 (17.4%) |
| Disease | 30               | $\leq 8.0$         | 1636       | 284 (17.4%)  |
| All     | 125              | $\leq 8.0$         | 13339      | 2469 (18.5%) |
| Disease | 125              | $\leq 8.0$         | 1131       | 219 (19.3%)  |

## 4 Summary of performance

### 4.1 Selection: fractional identity

Summary of performance for the fractional identity.  $P$ -values were computed using Fisher's exact test.  $T$ : number of all residues;  $C$ : number of positions;  $D$ : number of disease mutations;  $D \wedge C$ : number of disease-affected positions.

| subset              | T      | D     | C      | D $\wedge$ C | LOD  | <i>p</i> -value        |
|---------------------|--------|-------|--------|--------------|------|------------------------|
| Conservation, (0.2) | 741436 | 14211 | 351880 | 8726         | 0.37 | $< 2.2 \cdot 10^{-16}$ |
| Conservation, (0.5) | 741436 | 14211 | 145829 | 4977         | 0.83 | $< 2.2 \cdot 10^{-16}$ |
| Conservation, (0.8) | 741436 | 14211 | 51533  | 2357         | 1.25 | $< 2.2 \cdot 10^{-16}$ |

## 4.2 Selection: contact residues

Summary of performance for contact residues. *P*-values were computed using Fisher's exact test. *T*: number of all residues; *C*: number of contact positions; *D*: number of disease mutations; *D*  $\wedge$  *C*: number of contact residues affected by disease-associated mutations.

| subset                 | T     | D    | C     | D $\wedge$ C | LOD  | <i>p</i> -value        |
|------------------------|-------|------|-------|--------------|------|------------------------|
| Contact ( $\leq 5.5$ ) | 70589 | 2747 | 59079 | 2522         | 0.13 | $< 2.2 \cdot 10^{-16}$ |
| Contact ( $\leq 8.0$ ) | 70589 | 2747 | 59022 | 2523         | 0.13 | $< 2.2 \cdot 10^{-16}$ |

## 4.3 Alignment cutoff $\geq 30$ , fractional identity

Summary of performance for the alignment cutoff  $\geq 30$  and using the fractional identity conservation score. *P*-values were computed using Fisher's exact test. *T*: number of all residues; *C*: number of correlated positions; *D*: number of disease mutations; *D*  $\wedge$  *C*: number of correlated residues affected by disease-associated mutations.

| subset                               | T      | D     | C     | D $\wedge$ C | LOD  | <i>p</i> -value        |
|--------------------------------------|--------|-------|-------|--------------|------|------------------------|
| Correlation                          | 741436 | 14211 | 62365 | 1988         | 0.73 | $< 2.2 \cdot 10^{-16}$ |
| Correlation, (0.2)                   | 396202 | 5531  | 23787 | 567          | 0.77 | $< 2.2 \cdot 10^{-16}$ |
| Correlation, (0.5)                   | 605072 | 9342  | 50105 | 1429         | 0.88 | $< 2.2 \cdot 10^{-16}$ |
| Correlation, (0.8)                   | 691531 | 11869 | 62182 | 1980         | 0.89 | $< 2.2 \cdot 10^{-16}$ |
| Correlation, non-contact ( $> 5.5$ ) | 70589  | 2747  | 4960  | 252          | 0.38 | 0.0018                 |
| Correlation, non-contact ( $> 8.0$ ) | 70589  | 2747  | 5027  | 256          | 0.39 | 0.0016                 |

## 4.4 Alignment cutoff $\geq 125$ , BLOSSUM conservation score

Summary of performance for the alignment cutoff  $\geq 125$  and using the BLOSSUM conservation score. *P*-values were computed using Fisher's exact test. *T*: number of all residues; *C*: number of correlated positions; *D*: number of disease mutations; *D*  $\wedge$  *C*: number of correlated residues affected by disease-associated mutations.

| subset                               | T      | D     | C     | D $\wedge$ C | LOD  | <i>p</i> -value        |
|--------------------------------------|--------|-------|-------|--------------|------|------------------------|
| Correlation                          | 538283 | 10508 | 46022 | 1498         | 0.73 | $< 2.2 \cdot 10^{-16}$ |
| Correlation, (0.0)                   | 244185 | 3488  | 14121 | 335          | 0.72 | $< 2.2 \cdot 10^{-16}$ |
| Correlation, (0.5)                   | 461193 | 7630  | 37573 | 1155         | 0.90 | $< 2.2 \cdot 10^{-16}$ |
| Correlation, (0.8)                   | 512819 | 9187  | 45723 | 1478         | 0.85 | $< 2.2 \cdot 10^{-16}$ |
| Correlation, non-contact ( $> 5.5$ ) | 55156  | 1982  | 3922  | 166          | 0.23 | 0.14                   |
| Correlation, non-contact ( $> 8.0$ ) | 74459  | 2988  | 3969  | 167          | 0.23 | 0.16                   |

## 4.5 Alignment cutoff $\geq 125$ , fractional identity

Summary of performance for the alignment cutoff  $\geq 125$  and using the fractional identity. *P*-values were computed using Fisher's exact test. *T*: number of all residues; *C*: number of correlated positions; *D*: number of disease mutations; *D*  $\wedge$  *C*: number of correlated residues affected by disease-associated mutations.

| subset                               | T      | D     | C     | D $\wedge$ C | LOD  | <i>p</i> -value        |
|--------------------------------------|--------|-------|-------|--------------|------|------------------------|
| Correlation                          | 538283 | 10508 | 46022 | 1498         | 0.73 | $< 2.2 \cdot 10^{-16}$ |
| Correlation, (0.2)                   | 329385 | 4790  | 20527 | 494          | 0.72 | $< 2.2 \cdot 10^{-16}$ |
| Correlation, (0.5)                   | 465174 | 7604  | 37743 | 1113         | 0.85 | $< 2.2 \cdot 10^{-16}$ |
| Correlation, (0.8)                   | 513699 | 9215  | 45849 | 1492         | 0.85 | $< 2.2 \cdot 10^{-16}$ |
| Correlation, non-contact ( $> 5.5$ ) | 55156  | 1982  | 3922  | 166          | 0.23 | 0.14                   |
| Correlation, non-contact ( $> 8.0$ ) | 74459  | 2988  | 3969  | 167          | 0.23 | 0.16                   |

## 5 LOD score histograms for functionally important residues (Swissprot annotation)

Functionally important residues based on Swissprot annotation. Following keyword were used: CA\_BIND, DNA\_BIND, NP\_BIND, ACT\_SITE, METAL, BINDING, MOD\_RES, LIPID.

### 5.1 Empirical back-ground distribution

Empirical background distribution obtained by 1000 permutations. Vertical lines indicate the observed LOD.

#### 5.1.1 Alignment cutoff $\geq 30$

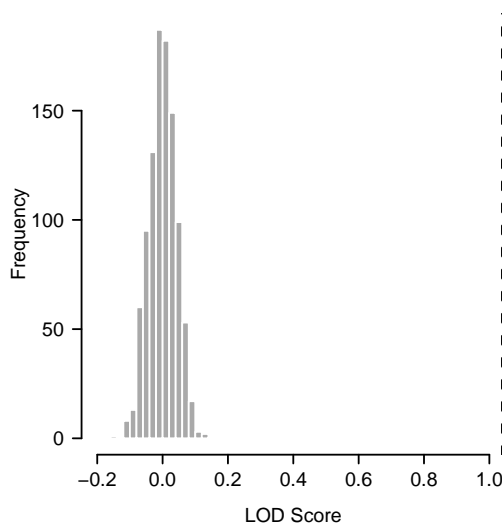

### 5.1.2 Alignment cutoff $\geq 125$

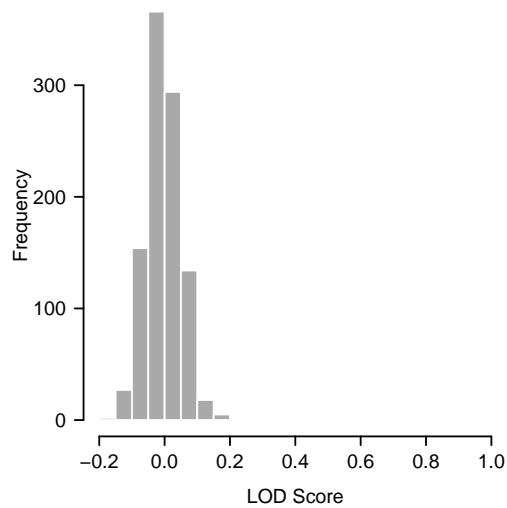

## 5.2 LOD distribution for individual proteins

Distribution of log odds (LOD) scores for individual proteins (equivalent to Figure 2a). All proteins were excluded for which no score could be obtained.

### 5.2.1 Alignment cutoff $\geq 30$

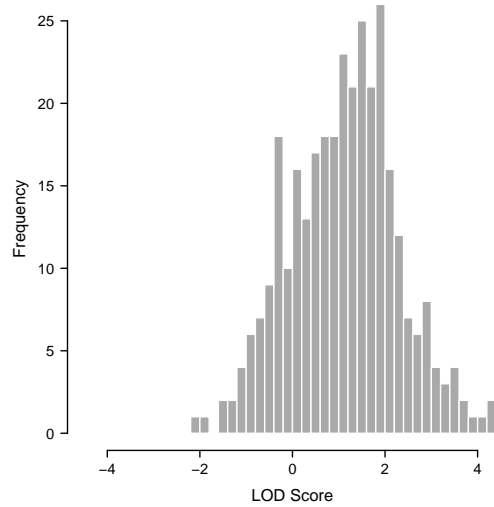

### 5.2.2 Alignment cutoff $\geq 125$

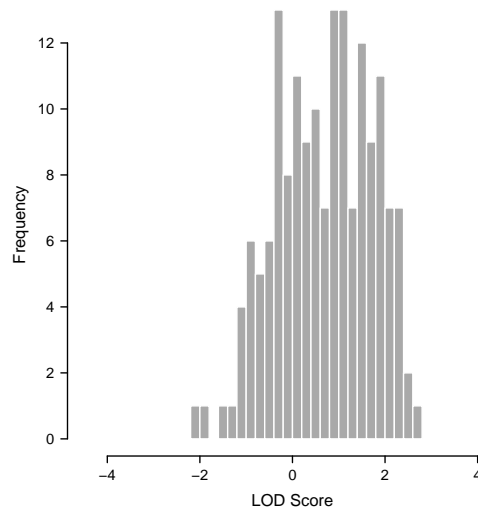

## 6 LOD score histograms for functionally important residues (Swissprot annotation + HGMD)

Functionally important residues based on Swissprot annotation and HGMD disease-associated point mutations.

### 6.1 Empirical background distribution

Empirical background distribution obtained by 1000 permutations. Vertical lines indicate the observed LOD.

#### 6.1.1 Alignment cutoff $\geq 30$

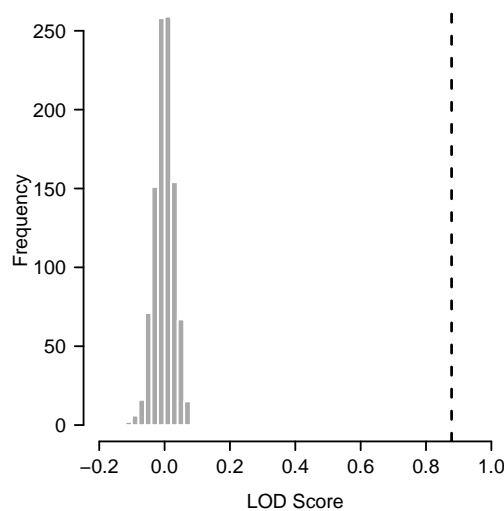



### 6.1.2 Alignment cutoff $\geq 125$

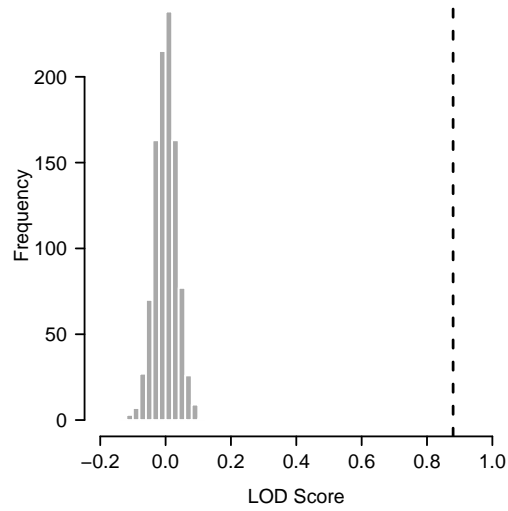

## 6.2 LOD distribution for individual proteins

Distribution of log odds (LOD) scores for individual proteins (equivalent to Figure 2a). All proteins were excluded for which no score could be obtained.

### 6.2.1 Alignment cutoff $\geq 30$

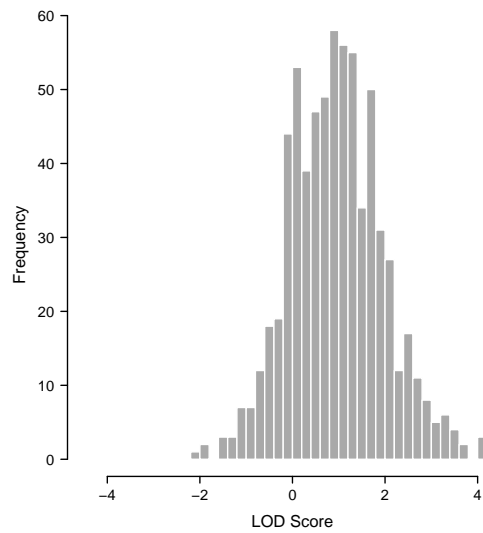

## 6.2.2 Alignment cutoff $\geq 125$

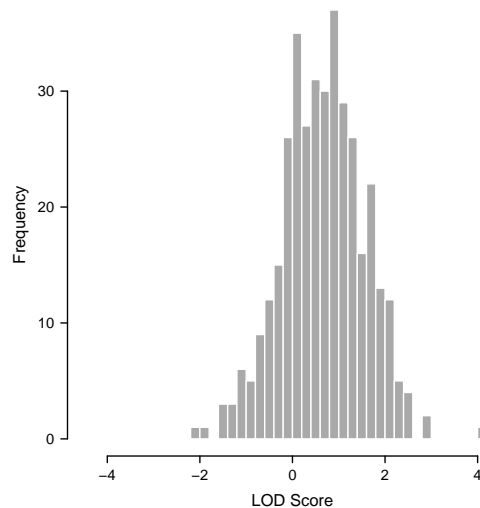

## 7 Results of Noivirt Method

In order to evaluate our results, we repeated our analysis with the method of Noivirt et al. Aside from slight differences in the specific numbers, this analysis fully confirms the conclusions obtained by the OMES method.

### 7.1 LOD distribution for individual proteins

#### 7.1.1 All proteins

Distribution of log odds (LOD) scores for individual proteins using the Noivirt method (equivalent to Figure 2a). All proteins were excluded for which no score could be obtained.

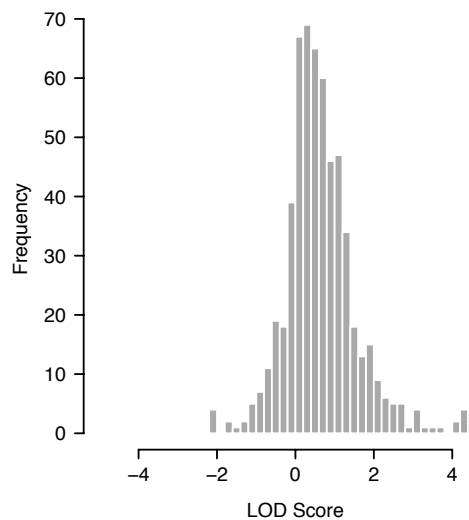

#### 7.1.2 Proteins with $\geq 10$ disease mutations

Distribution of log odds (LOD) scores for individual proteins using the Noivirt method (equivalent to Figure 2b). All proteins were excluded for which no score could be obtained. LOD scores were plotted only for proteins with  $\geq 10$  known disease mutations in HGMD. All proteins were excluded for which no score could be obtained.

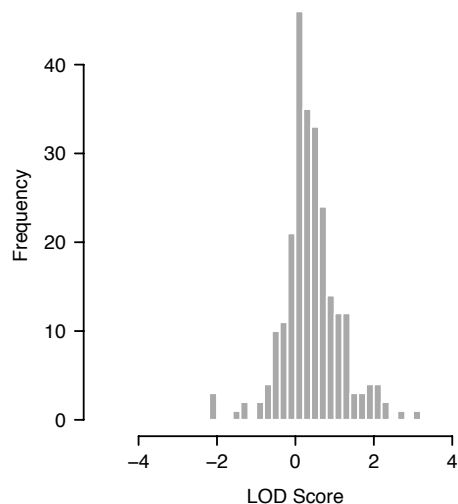

## 7.2 Interaction between correlation and conservation

### 7.2.1 BLOSSUM conservation score

Interaction between correlation and conservation. LOD distribution for conservation thresholds using the BLOSSUM conservation score (equivalent to Figure 3a). Each dot represents the LOD score achieved using a specific conservation cutoff. A cutoff of 0.4 indicates that for the calculation of the global LOD score only the residues which have a conservation score  $\leq 0.4$  were taken into account.

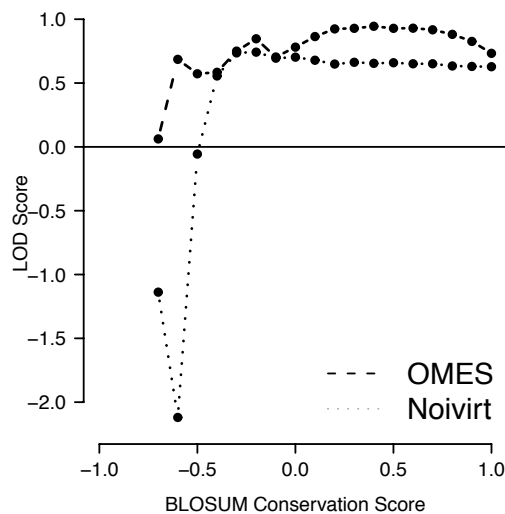

### 7.2.2 Fractional identity

Interaction between correlation and conservation. LOD distribution for conservation thresholds using the fractional identity (equivalent to Figure 3b). Each dot represents the LOD score achieved using a specific conservation cutoff. A cutoff of 0.4 indicates that for the calculation of the global LOD score only the residues which have a conservation score  $\leq 0.4$  were taken into account.

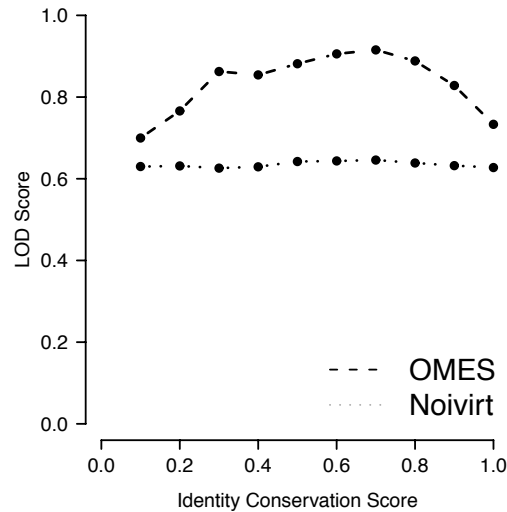

## 8 Results of McBASC

In order to evaluate our results, we repeated our analysis with the McBASC method (Göbel et al. 1994; Olmea and Valencia 1997). Aside from slight differences in the specific numbers, this analysis fully confirms the conclusions obtained by the OMES and Noivirt methods.

### 8.1 LOD distribution for individual proteins

#### 8.1.1 All proteins

Distribution of log odds (LOD) scores for individual proteins using the Noivirt method (equivalent to Figure 2a). All proteins were excluded for which no score could be obtained.

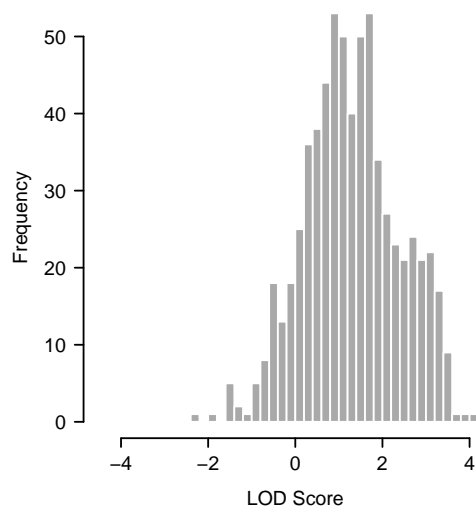

#### 8.1.2 Proteins with $\geq 10$ disease mutations

Distribution of log odds (LOD) scores for individual proteins using the Noivirt method (equivalent to Figure 2b). All proteins were excluded for which no score could be obtained. LOD scores were plotted only for proteins with  $\geq 10$  known disease mutations in HGMD. All proteins were excluded for which no score could be obtained.

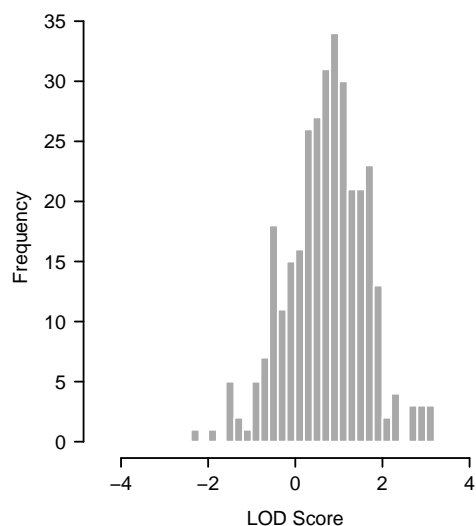

## 8.2 Interaction between correlation and conservation

### 8.2.1 BLOSSUM conservation score

Interaction between correlation and conservation. LOD distribution for conservation thresholds using the BLOSSUM conservation score (equivalent to Figure 3a). Each dot represents the LOD score achieved using a specific conservation cutoff. A cutoff of 0.4 indicates that for the calculation of the global LOD score only the residues which have a conservation score  $\leq 0.4$  were taken into account.

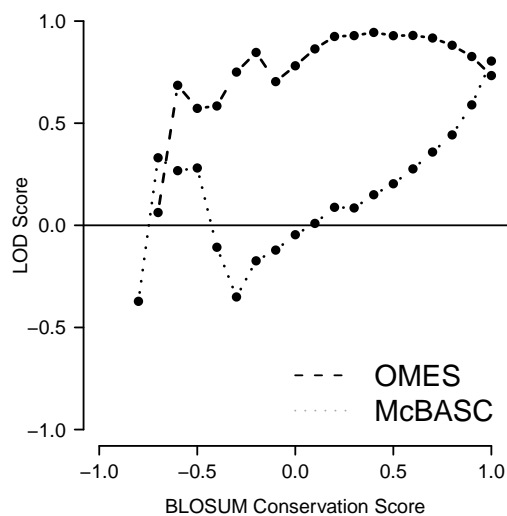

### 8.2.2 Fractional identity

Interaction between correlation and conservation. LOD distribution for conservation thresholds using the fractional identity (equivalent to Figure 3b). Each dot represents the LOD score achieved using a specific conservation cutoff. A cutoff of 0.4 indicates that for the calculation of the global LOD score only the residues which have a conservation score  $\leq 0.4$  were taken into account.

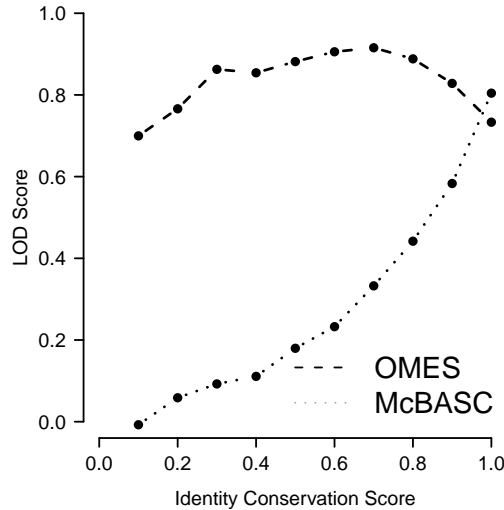

## 9 Comparison of different methods

Summary of performance for the OMES method using the alignment cutoff  $\geq 30$  and  $\geq 125$  as well as the Noivirt and McBASC methods.  $P$ -values were computed using Fisher's exact test.  $T$ : number of all residues;  $C$ : number of correlated positions;  $D$ : number of disease mutations;  $D \wedge C$ : number of correlated residues affected by disease-associated mutations.

| Set                 | T      | D     | C      | $D \wedge C$ | LOD  | $p$ -value             |
|---------------------|--------|-------|--------|--------------|------|------------------------|
| OMES ( $\geq 30$ )  | 741436 | 14211 | 62365  | 1988         | 0.73 | $< 2.2 \cdot 10^{-16}$ |
| OMES ( $\geq 125$ ) | 538283 | 10508 | 46022  | 1498         | 0.73 | $< 2.2 \cdot 10^{-16}$ |
| Noivirt             | 699882 | 13671 | 154840 | 4675         | 0.63 | $< 2.2 \cdot 10^{-16}$ |
| McBASC              | 935439 | 16085 | 99391  | 3001         | 0.81 | $< 2.2 \cdot 10^{-16}$ |

## 10 Protein interfaces

Protein-protein interactions and therefore protein interfaces play a central role in health and disease. In order to validate whether correlated mutation located within an interface are enriched disease-associated we analyze the set of human disease proteins for which at least a partial crystal structure was available from the PDB database. We used the meta-PPISP meta-server [Qin and Zhou, 2007] which is based on three individual web servers: cons-PPISP, PINUP, and Promate to predict protein interfaces. Using the meta-server, we finally obtained a predictions for 191 human disease proteins.

Using all residues represented in the datasets described above, we produced contingency tables of correlatedness vs. known disease-mutations. Based on these tables, we computed the background rates of disease mutations to be 0.038% for random positions and 0.048% for correlated positions. In other words, we find known disease positions weakly enriched in protein interfaces than expected by chance (LOD = 0.33,  $p = 7.26 \cdot 10^{-4}$ ).

## 11 Bootstrapping approach

In order to evaluate the error around the LOD values we conducted three slightly different bootstrapping experiments involving 1000 samples (with replacement), each.

### 11.1

In the first experiment, bootstrap samples were generated separately for each protein: I.e. positions (columns in the multiple sequence alignments) were randomly sampled separately for each protein (i.e.

MSA). Then the LOD values were computed for each bootstrapped data set.

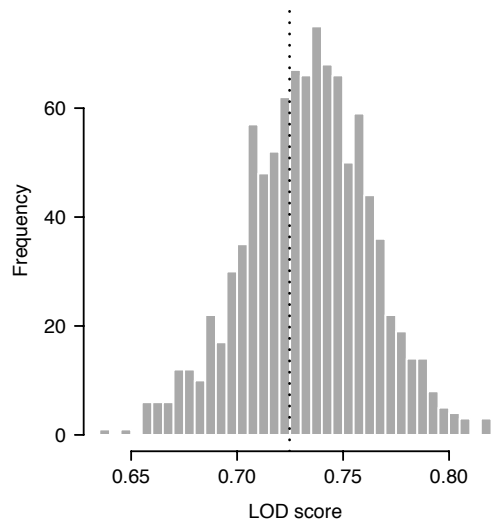

## 11.2

In the second experiment, entire MSAs were sampled. I.e. we randomly chose entire proteins (and not positions/MSA columns) from the original dataset without changing the composition of the individual MSAs.

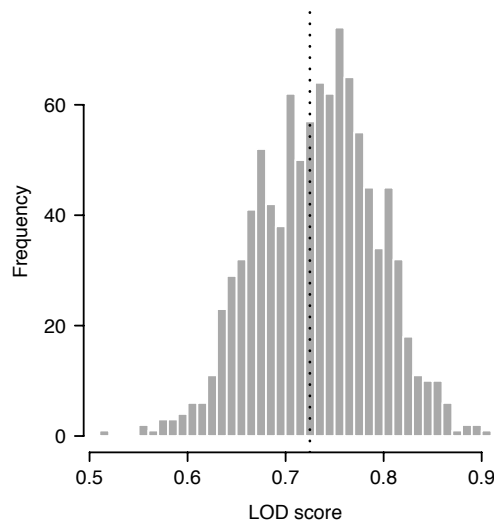

## 11.3

In the third experiment, we first fused all MSA alignments into one giant MSA containing all protein sequences and then proceeded sampling random columns from the concatenated MSA. This approach is different from the first one, because the whole dataset is treated like single giant sequence instead of obeying the protein boundaries.

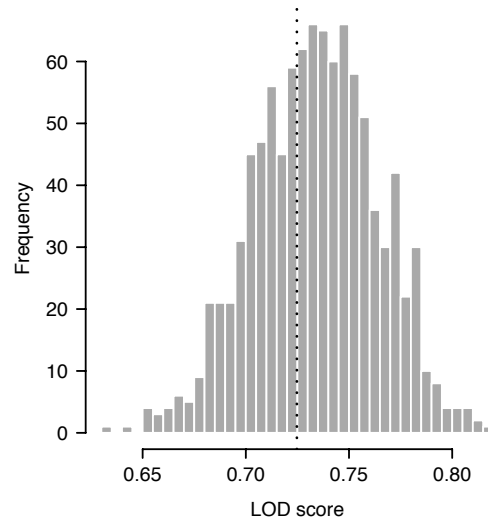

For each of these new data sets, the corresponding LOD score is calculated. The vertical line indicates the obtained LOD score for the OMES method using the alignment cutoff  $\geq 30$ .
